# Supplementary material for: Introducing a static receptor to compete with a dynamic combinatorial library in template binding
Source: Royal Society of Chemistry journal article supplement (doi:10.1039/c5ob01698c), 2015-01-01
Supplement: c5ob01698c1.pdf [file c5ob01698c1.pdf]

# Introducing a static receptor to compete with a dynamic combinatorial library in template binding

Filip Ulatowski, Dawid Lichosyt and Janusz Jurczak\*

Institute of Organic Chemistry, Polish Academy of Sciences,  
Kasprzaka 44/52, 01-224 Warsaw, Poland  
janusz.jurczak@icho.edu.pl

## Supplementary Information

### ***Procedures for library preparations and analysis.***

Synthesis of **1<sub>n</sub>** and preparation of its stock solution was described previously.<sup>S1</sup>

All DCL experiments were conducted in DMSO + 0.5% H<sub>2</sub>O on 100 μL scale with a total concentration of monomer: 0.005 mol/dm<sup>3</sup>. The mixture of DCL, static receptor and/or TBA benzoate salt was stirred for 4 h. After that time, TFA in MeCN (0.1 mol/dm<sup>3</sup>, 400 μL) was added to freeze the equilibrium. The samples were then subjected to HPLC analysis: ACE-Phenyl 5 μm, I.D.= 4.6 mm, l=25 cm, column. Flow: 1.5mL/min, gradient indicated in Table S1. Retention time of all compounds are presented in Table S2.

**Table S1.** Gradient composition in HPLC analyses.

| Time [min] | MeCN (%) | H <sub>2</sub> O (%) | 1% TFA in MeCN (%) |
|------------|----------|----------------------|--------------------|
| 0          | 39       | 60                   | 1                  |
| 12         | 59       | 40                   | 1                  |
| 14         | 89       | 10                   | 1                  |
| 16         | 89       | 10                   | 1                  |

**Table S2.** HPLC peaks assignments.

| Time [min] | Compound             |
|------------|----------------------|
| 3.62       | BzOH                 |
| 4.43       | <b>M<sub>2</sub></b> |
| 5.21       | Host <b>5</b>        |
| 7.51       | <b>M<sub>3</sub></b> |
| 8.77       | Host <b>4</b>        |
| 9.21       | <b>M<sub>4</sub></b> |
| 10.68      | <b>M<sub>5</sub></b> |
| 12.17      | Host <b>1</b>        |
| 15.78      | Host <b>3</b>        |
| 16.74      | Host <b>2</b>        |

## Fitting procedure using DCL-fit

Equilibrium constants of formation of library components ( $K_n$ ) and association constants ( $K_{n-T}$ ) of complexes of receptors  $1_n$  with benzoate were determined previously.<sup>S1</sup>

DCL-fit software (available from Otto, <http://www.otto-lab.com/software.htm>) was applied as depicted in Fig S1.

The screenshot shows the DCLFit Input Builder interface with several sections and callouts:

- Parameters:** A table with columns: Copy, Delete, Name, Fitted?, Guess, Min, Max, MC Min, MC Max. It contains two rows: 'K-rec' (Fitted? checked, Guess 1.7) and '[Rec]' (Fitted? unchecked, Guess 2). Callout: 'association constant to be determined'.
- Model 0 Blocks:** A table with columns: Copy, Delete, Name, Concentration, Real?. It contains three rows: 'A' (Concentration 0.005), 'Rec' (Concentration [Rec]), and 'T' (Concentration 0.005). Callout: 'concentrations in the experiment A - library monomer; Rec - static receptor; T - template (benzoate)'.
- Compounds:** A table with columns: Copy, Delete, Name, logKf, Relative To, Aggregates?, LogKagg, logrho, Composition, A, Rec, T. It contains rows for A2, A3, A4, A2-T, A3-T, A4-T, and Rec-T. Callouts: 'formation constants ( $K_n$ ) of library components determined in a dilution experiment (see Ref. S1)', 'association constants ( $K_{n-T}$ ) determined in a templation experiment in the absence of the static receptor (see Ref. S1)', and 'complex of static receptor (Rec) with benzoate (template - T)'.
- Observables:** A table with columns: Copy, Delete, Name, A, Rec, T, A2, A3, A4, A2-T, A3-T, A4-T, Rec-T. It contains rows for A2t, A3t, and A4t.
- Experiments:** A table with columns: Copy, Delete, [Rec], A2t, A2t weight, A3t, A3t weight, A4t, A4t weight. It contains one row with values: 0.005, 0.00191, 1, 2.92e-4, 1, 5.84e-5, 0.0. Callouts: 'templation experiment results (from HPLC)' and 'concentration of tetramer is neglected in the fitting procedure due to its high uncertainty'.

**Figure S1** Input data in DCL-fit for the experiment with a static receptor and benzoate.

**Table S3.** DCLfit results for receptors 1,2,4,5.

| host | concentrations in DCL |         |         | $z=[M_2]/[M_3]$ | $\log(K_{Rec})$ by DCLfit | $\log(K_{Rec})$ by titraion |
|------|-----------------------|---------|---------|-----------------|---------------------------|-----------------------------|
|      | $M_2$                 | $M_3$   | $M_4$   |                 |                           |                             |
| 1    | 2.02E-3               | 2.44E-4 | 4.52E-5 | 8.27            | 1.74                      | 1.78                        |
| 2    | 1.91E-3               | 2.92E-4 | 5.87E-5 | 6.53            | 3.24                      | 3.11                        |
| 4    | 1.91E-3               | 2.92E-4 | 5.84E-5 | 6.53            | 3.23                      | 3.20                        |
| 5    | 1.96E-3               | 2.78E-4 | 5.03E-5 | 7.04            | 2.75                      | 2.77                        |

## Templation effects of host 3

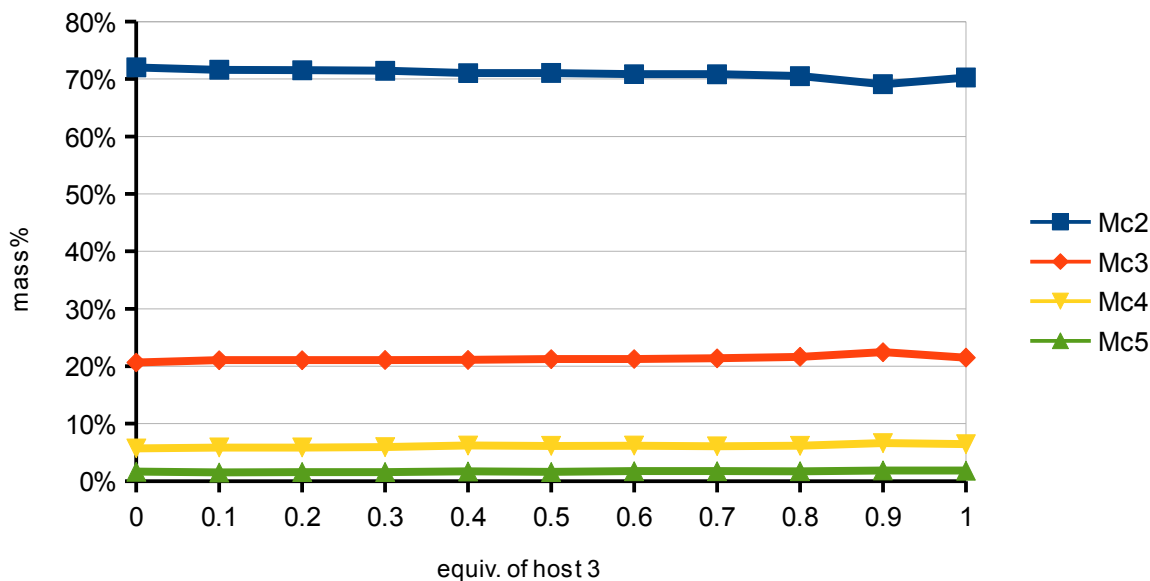

**Figure S2** Templation of library  $M_n$  with receptor **3** induces a slight reduction in the abundance of dimer, while trimer and tetramer are amplified.

## Dilution experiments – check for thermodynamic control of the system

We conducted a set of dilution experiments in which the composition of DCL was evaluated at different total concentrations of monomer. Experiments were run with pure DCL and with static receptor **1** added ( $c=0.005M$  in all experiments). Our system can be treated with a modified Jacobson-Stockmayer theory with monomer as a virtual component and no linear oligomers. The linear correlations between the concentrations of a given macrocycle ( $M_n$ ) and the total concentration of a monomer in a double log plot prove the reversibility of the system (Fig. S3). The data were also nicely fitted (Fig. S4) with DCLfit software utilising the model expressed in Scheme 1. The conformity between results obtained for pure DCL and DCL with static host indicates that addition of static host does not influence the reversibility of the disulfide bond exchange.

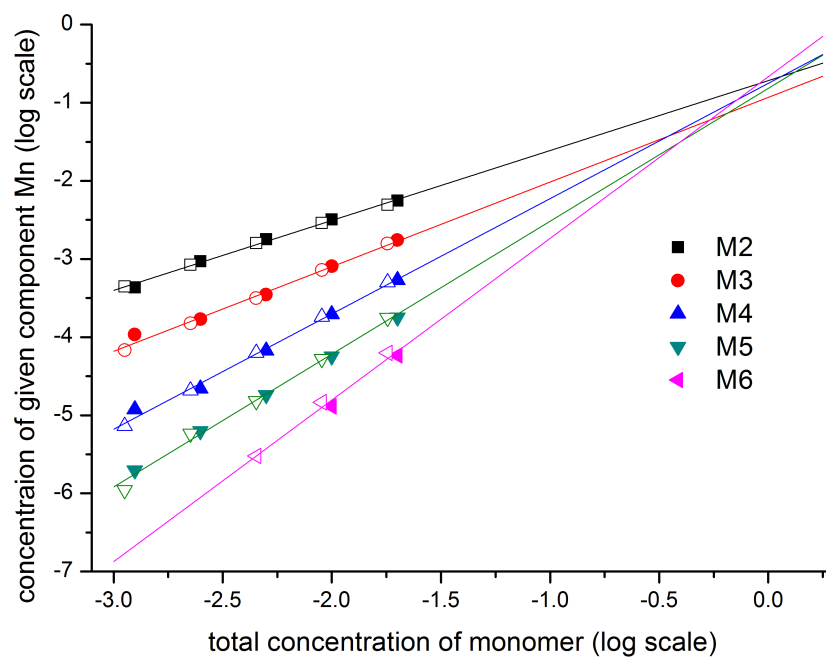

**Figure S3** A plot in logarithm scale depicting the concentrations of macrocycles in a series of DCLs set with various total concentration of monomer. Full symbols correspond to solutions of pure DCL, open symbols correspond to DCLs containing static receptor **1** ( $c=0.005\text{M}$  in all solutions).

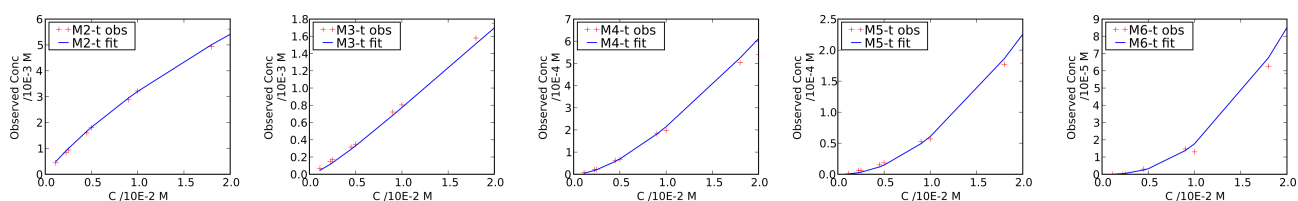

**Figure S4** Concentrations of macrocycles in dilution experiments fitted with DLCfit.

### Reference:

S1 F. Ulatowski, A. Sadowska-Kuzioła and J. Jurczak, *J. Org. Chem.*, 2014, **79**, 9762–9770.
